# Supplementary material for: Efficient amine oxidation using metal–organic framework photocatalysts for aminoalkyl radical-mediated halogen-atom transfer
Source: Royal Society of Chemistry journal article supplement (doi:10.1039/d2ta09819a), 2023-01-01
Supplement: d2ta09819a1.pdf [file d2ta09819a1.pdf]

## Supporting Information

### Efficient Amines Oxidation Using Metal-Organic Framework Photocatalysts for Aminoalkyl Radicals-Mediated Halogen- Atom Transfer

Xin Liu,<sup>a</sup> Zhifen Guo,<sup>a</sup> Yan Che,<sup>a</sup> Xingbing Liu,<sup>a</sup> Min Yu,<sup>a</sup> Jiahuan Lv,<sup>a</sup>

Mengying Li,<sup>a</sup> Hongzhu Xing<sup>\*,a</sup> and Peng Chen<sup>\*,b</sup>

<sup>a</sup> Laboratory of Advanced Energy Materials, College of Chemistry, Northeast Normal University, Changchun 130021, China

<sup>b</sup> Key Laboratory of Functional Inorganic Material Chemistry (MOE), School of Chemistry and Materials Science, Heilongjiang University, Harbin 150080, China

Email: xinghz223@nenu.edu.cn; chenpeng@hlju.edu.cn

#### Table of Contents

|                                                                         |     |
|-------------------------------------------------------------------------|-----|
| 1. Materials and Instrumentation.....                                   | S2  |
| 2. Figures S1-S15 and Tables S1-S2.....                                 | S3  |
| 3. General procedure.....                                               | S12 |
| 4. GC-MS spectrum for the trapping of $\alpha$ -aminoalkyl radical..... | S21 |
| 5. Determination of the Quantum Yield.....                              | S22 |
| 6. <sup>1</sup> H NMR Spectral Data.....                                | S24 |
| 7. References.....                                                      | S27 |

## 1. Materials and Instrumentation

Chemicals without special descriptions were commercially available and used without further purification.

Powder X-ray diffraction (PXRD) patterns were recorded on a Rigaku SmartLab X-Ray diffractometer operated at 40 kV/30 mA with Cu K $\alpha$  radiation ( $\lambda = 1.54178 \text{ \AA}$ ) at room temperature. The data were collected at a 10 deg/min scanning speed in the  $2\theta$  range from  $3^\circ$  to  $50^\circ$ . The UV-vis DRS spectrum of solid sample was recorded on a Cary 7000 spectrophotometer equipped with an integrating sphere. The UV-vis spectrum of solution was collected on a SHIMADZU UV-2550 spectrophotometer. Photocurrent measurements, Mott-Schottky plots and cyclic voltammetry were conducted on electrochemical workstation CHI 660E (ChenHua Instrument, Shanghai). The morphologies of samples were characterized by a field emission scanning electron microscopy (SEM, HITACHI SU8000) with an acceleration voltage of 3.0 kV. Edinburgh FLS920 fluorescence spectrometer was used to measure the emission lifetime and fluorescence quenching. Gas chromatography (GC) analysis was performed on a Shimadzu GC-2010 equipment. A 300 W xenon lamp was used as light source for the irradiation of catalytic reaction where a cut-off filter at 420 nm has been used to remove UV light and reaction vial was set to be 10 cm. For mass spectrometry, gas chromatograph-mass spectrometry was obtained using GC-MS (Agilent 6890/5973) with the following conditions: oven temperature,  $300^\circ\text{C}$ ; injector temperature,  $290^\circ\text{C}$ ; constant carrier gas flow rate, 1.0 mL/min; column temperature program,  $10^\circ\text{C}/\text{min}$ , from  $80^\circ\text{C}$  to  $280^\circ\text{C}$  holding for 10 min. The MS ionization source was 70 eV and the temperature of the ion source was  $200^\circ\text{C}$ .

Chromatographic purification of products was accomplished by silica gel chromatography. Thin layer chromatography (TLC) was performed on silica gel 60 F<sub>254</sub> plates. Visualization of the developed chromatogram was performed with either a compact UV-lamp (254/365 nm) and basic aqueous potassium permanganate (KMnO<sub>4</sub>) stain solutions. <sup>1</sup>H NMR spectra were recorded on Varian 500 MHz spectrometers at  $25^\circ\text{C}$ . Chemical shifts were reported in ppm from TMS with the solvent as the internal standard (CDCl<sub>3</sub> referenced at 7.27 ppm). Data for <sup>1</sup>H NMR were reported as follows: chemical shift ( $\delta$  ppm), multiplicity (s = singlet, br. s = broad singlet, d = doublet, dd = doublet duplet, ddd = double triplet t = triplet, q = quartet, m = multiplet,) and coupling constants (Hz).

## 2. Figures S1-S15 and Tables S1-S2

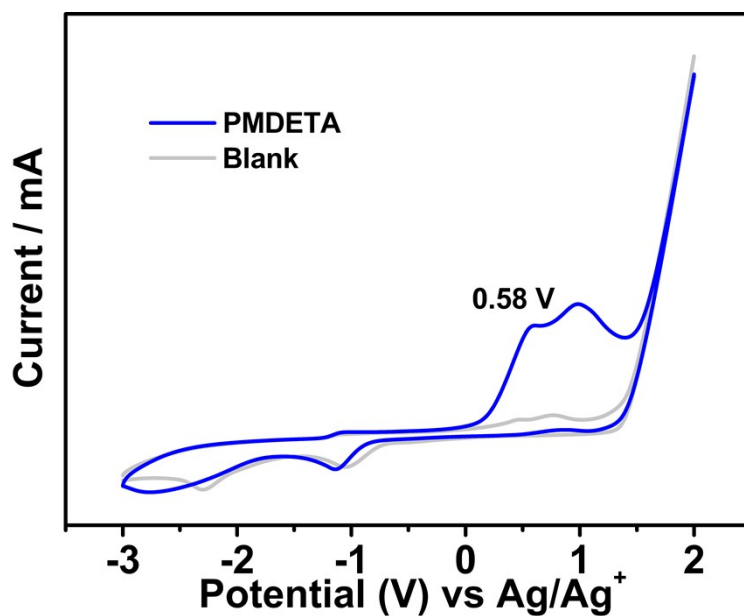

**Figure S1.** Cyclic voltammogram of PMDETA in DMF.  $E_{\text{ox}} = + 0.92$  V vs. SCE.

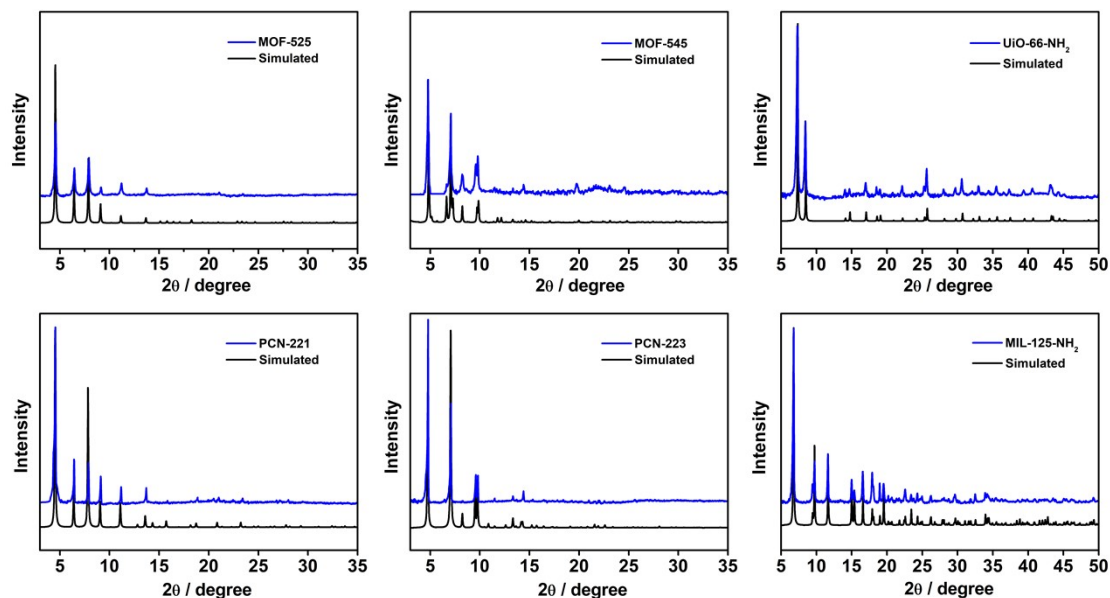

**Figure S2.** Experimental and simulated PXR D patterns of MOFs.

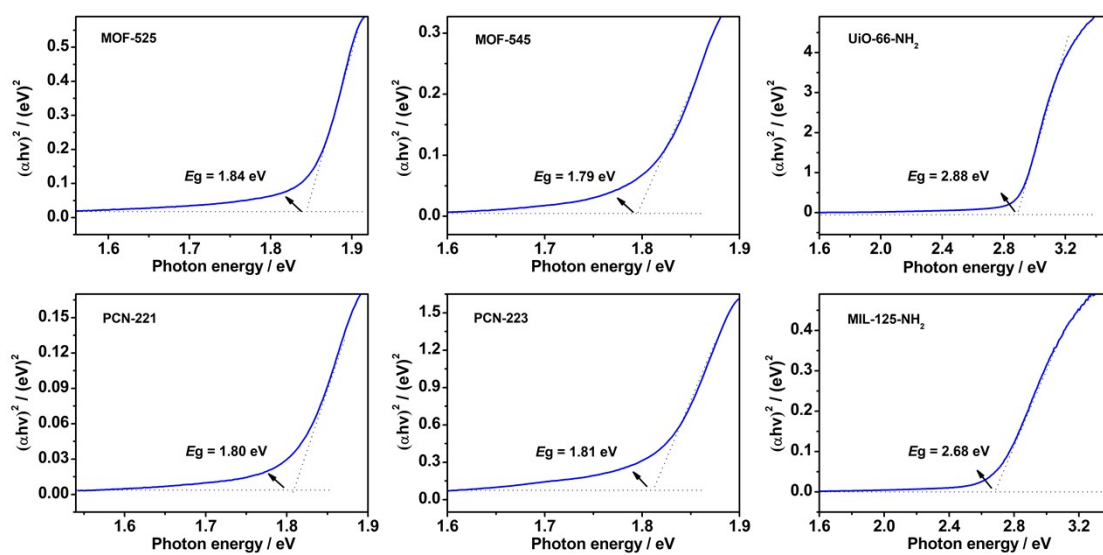

**Figure S3.** Tauc plots of MOFs.

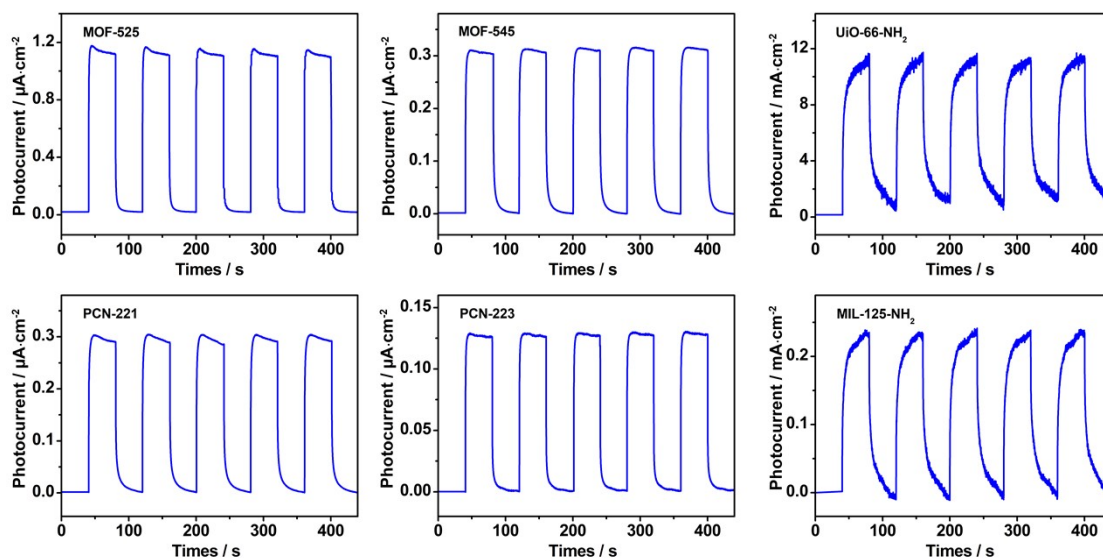

**Figure S4.** Transient photocurrent response of MOFs.

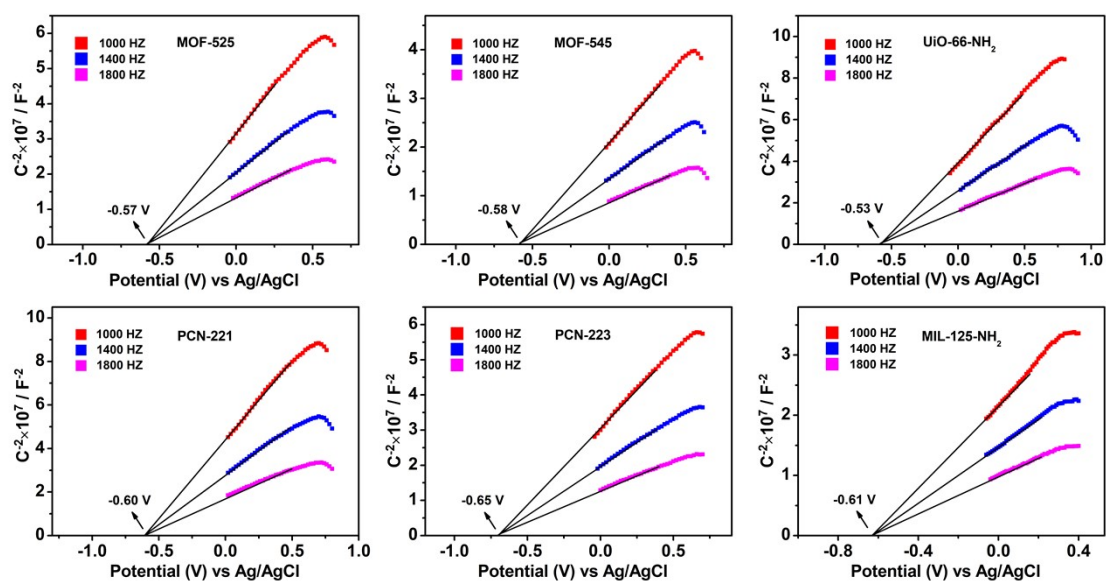

Figure S5. Mott-Schottky plots of MOFs.

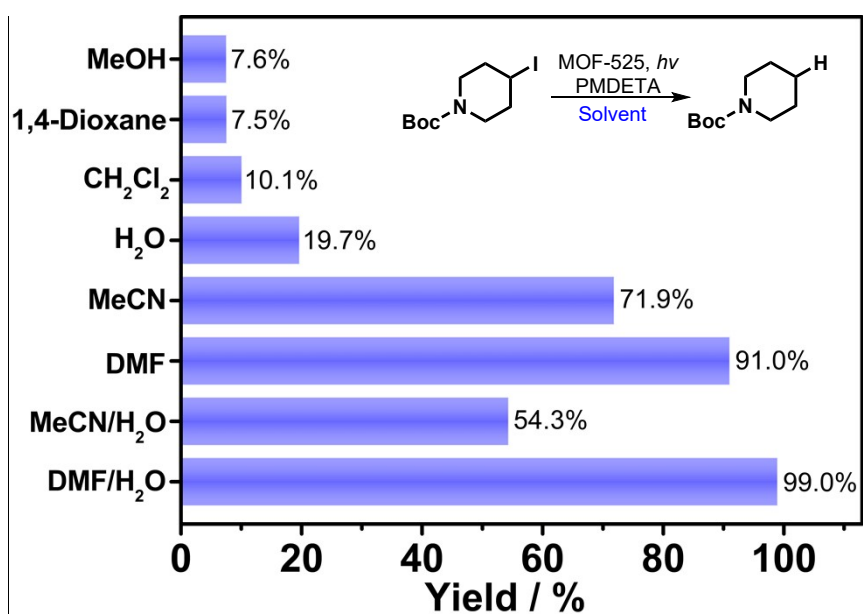

Figure S6. Solvent influence on photocatalytic dehalogenation using MOF-525.

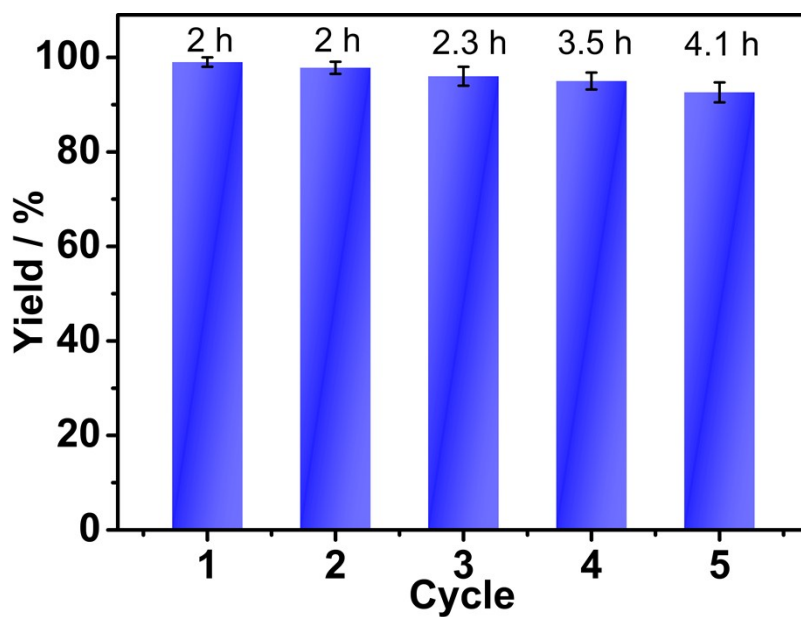

**Figure S7.** Cycling experiments of photocatalytic dehalogenation using MOF-525.

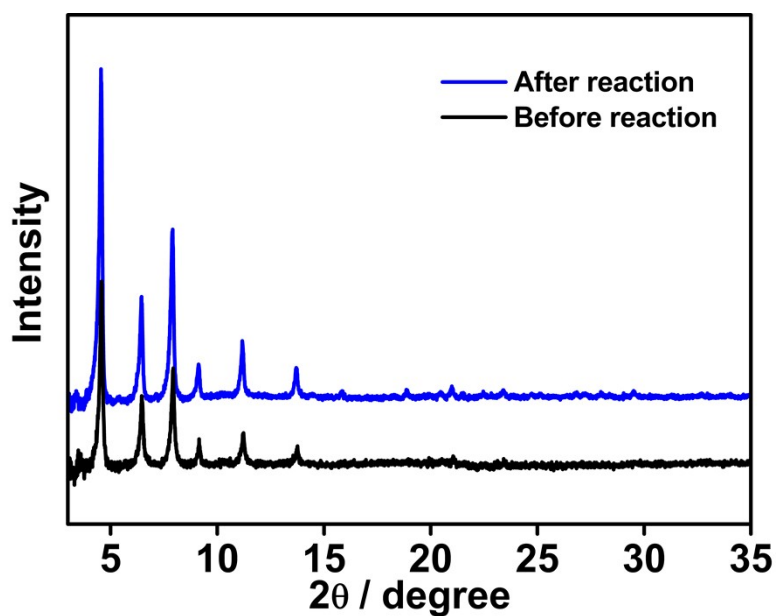

**Figure S8.** PXRD patterns of MOF-525 before and after cycling photocatalytic dehalogenation.

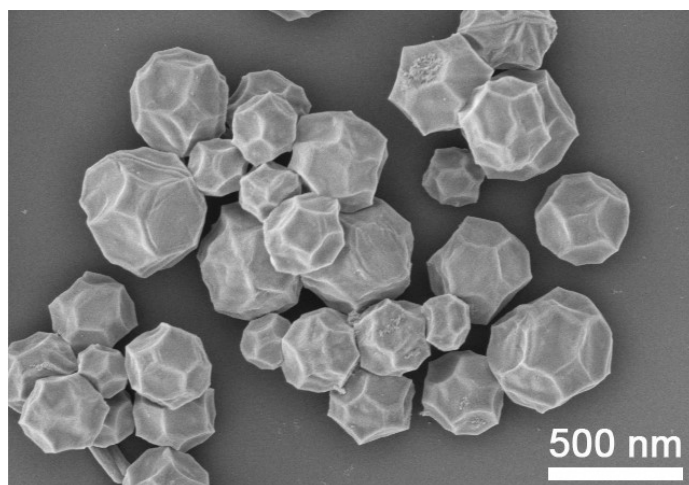

**Figure S9.** SEM of MOF-525 after cycling photocatalytic reaction.

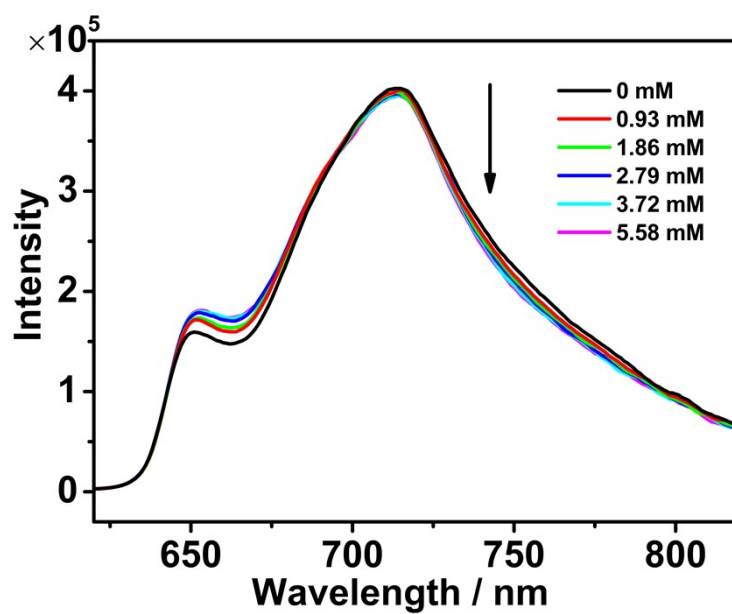

**Figure S10.** Fluorescence quenching of MOF-525 by **1** in DMF.

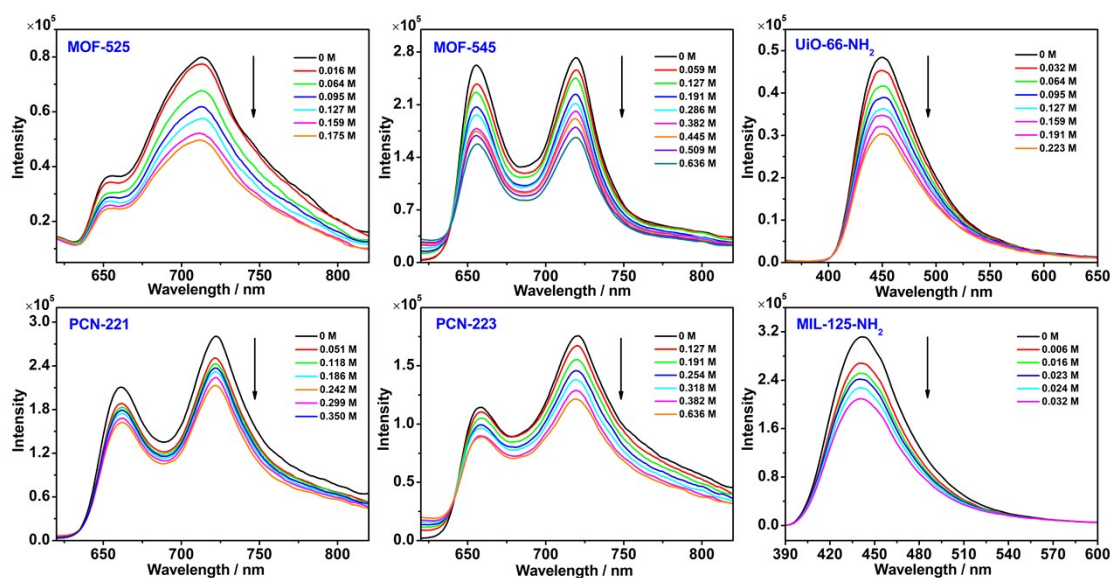

**Figure S11.** Fluorescence quenching of different MOFs using PMDETA. The excitation wavelength ( $\lambda_{\text{ex}}$ ) of MOF-525, MOF-545, PCN-221 and PCN-223 is 420 nm, and  $\lambda_{\text{ex}}$  (UiO-66-NH<sub>2</sub> and MIL-125-NH<sub>2</sub>) is 280 nm.



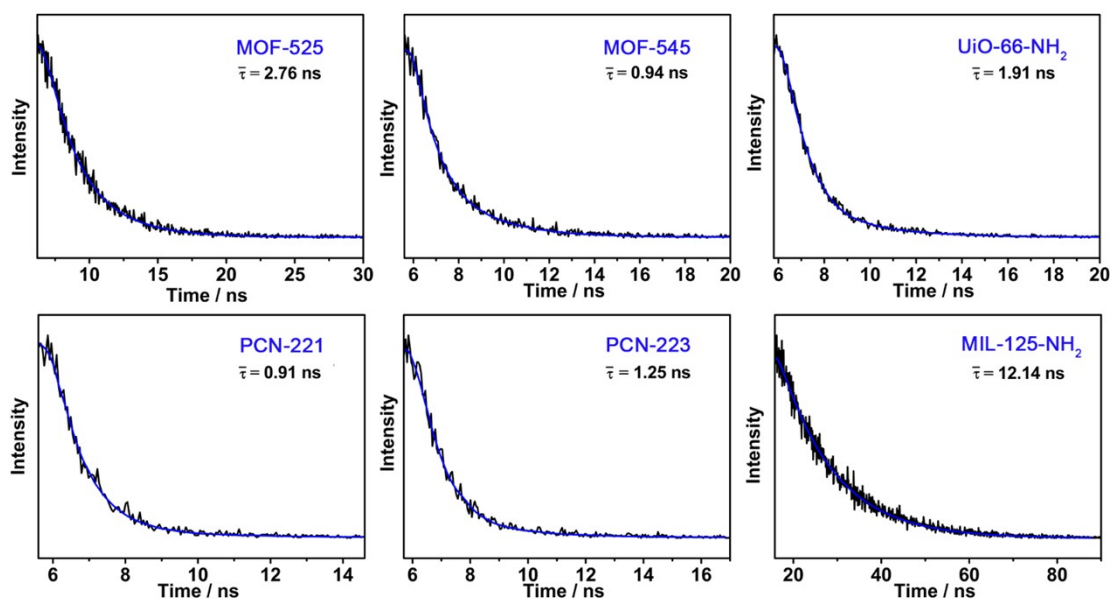

**Figure S12.** Fluorescence decay of MOFs.

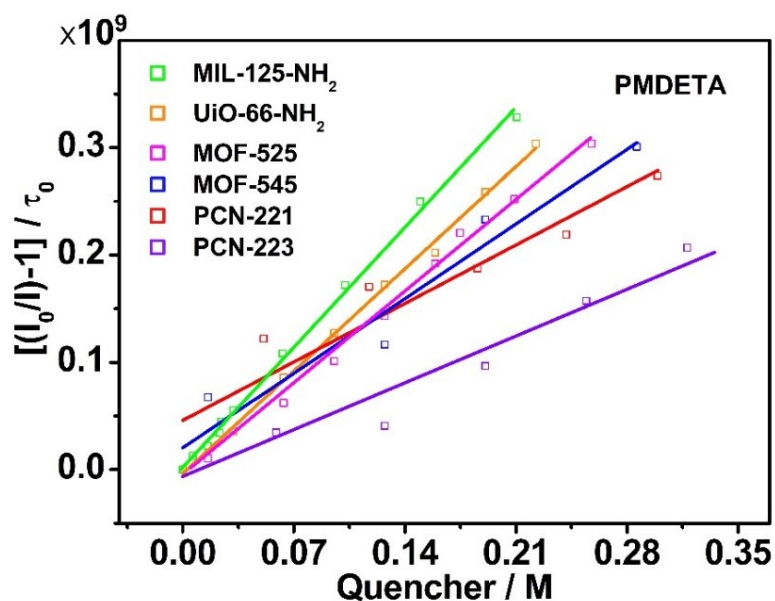

**Figure S13.** Quenching rate constants of various MOFs using PMDETA. Porphyrinic MOF-525, MOF-545, PCN-221 and PCN-223 were excited at 420 nm, UiO-66-NH<sub>2</sub> and MIL-125-NH<sub>2</sub> were excited at 280 nm.

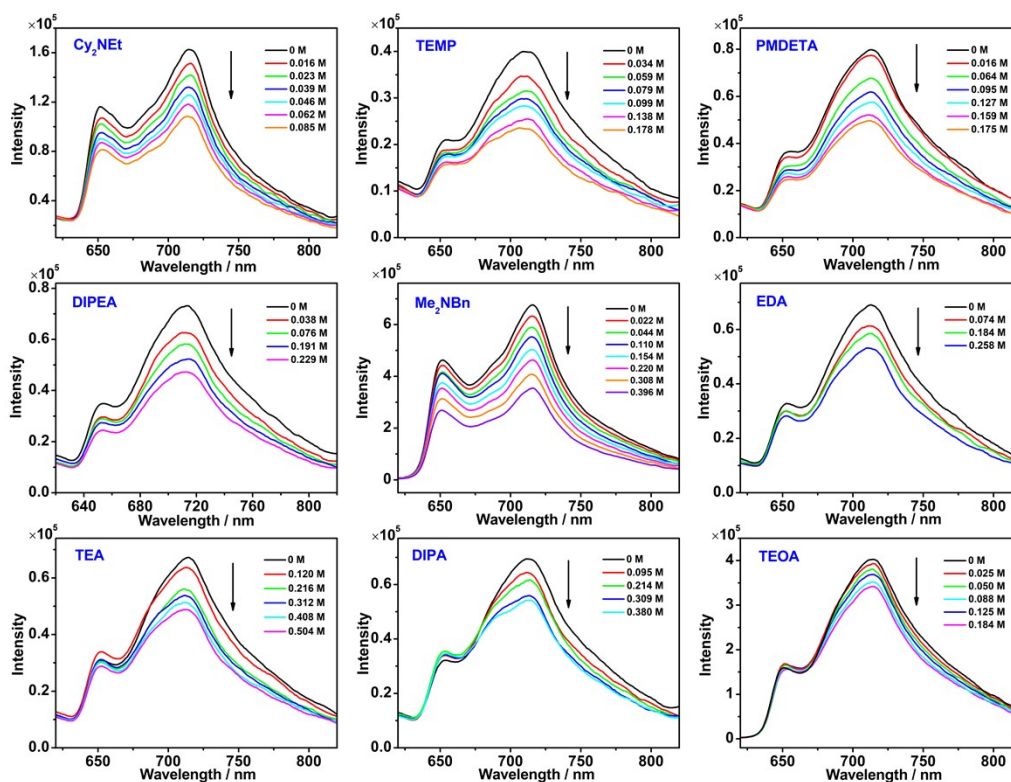

**Figure S14.** Fluorescence quenching of MOF-525 using different amines in DMF.

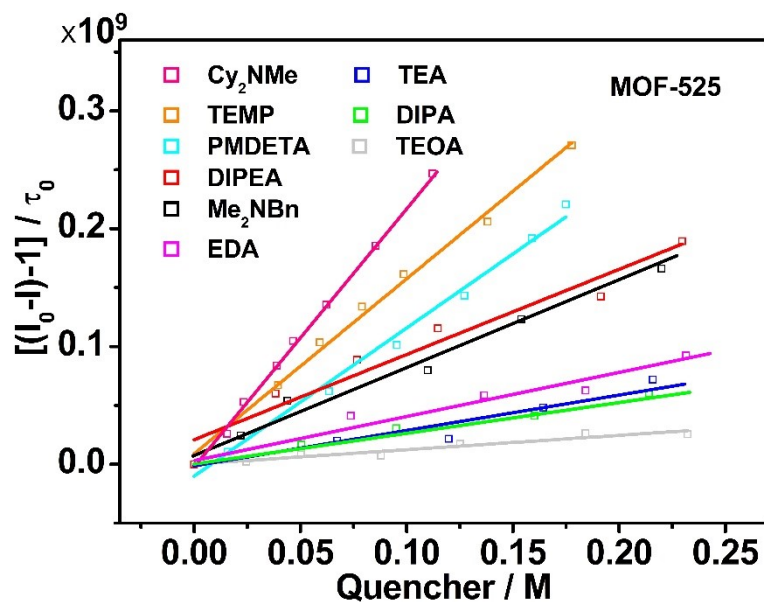

**Figure S15.** Quenching rate constants of MOF-525 using various amines.

**Table S1.** Visible-light-mediated dehalogenation under different conditions.

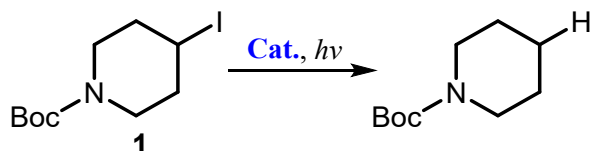

| Entry | Catalyst                               | Yield (%) |
|-------|----------------------------------------|-----------|
| 1     | Zr <sup>4+</sup>                       | 3.1       |
| 2     | T CPP                                  | 3.0       |
| 3     | Zr <sup>4+</sup> + T CPP               | 7.3       |
| 4     | BDC-NH <sub>2</sub>                    | 2.2       |
| 5     | Zr <sup>4+</sup> + BDC-NH <sub>2</sub> | 3.1       |
| 6     | Ti <sup>4+</sup>                       | 2.6       |
| 7     | Ti <sup>4+</sup> + BDC-NH <sub>2</sub> | 2.9       |

Scale of reaction: Catalyst (1.0 mol%), **1** (0.1 mmol), DMF/H<sub>2</sub>O (v/v=9/1, 1.0 mL), visible light, 2 hours.

**Table S2.** Information on experimental parameters of MOFs.

| MOF                     | $E_g$ (eV) | CB (vs. SCE) | VB (vs. SCE) | $\tau$ (ns) | $K_{SV}$ (M <sup>-1</sup> ) | ( $\times 10^9$ M <sup>-1</sup> s <sup>-1</sup> ) | Yield <sup>a</sup> (%) |
|-------------------------|------------|--------------|--------------|-------------|-----------------------------|---------------------------------------------------|------------------------|
| MOF-525                 | 1.84       | -0.71        | 1.13         | 2.76        | 3.47                        | 1.26                                              | 99.0                   |
| MOF-545                 | 1.79       | -0.72        | 1.07         | 0.94        | 0.95                        | 1.01                                              | 95.8                   |
| PCN-221                 | 1.80       | -0.74        | 1.06         | 0.91        | 0.86                        | 0.95                                              | 90.7                   |
| PCN-223                 | 1.81       | -0.79        | 1.02         | 1.25        | 0.77                        | 0.62                                              | 86.5                   |
| UiO-66-NH <sub>2</sub>  | 2.88       | -0.67        | 2.21         | 1.91        | 2.60                        | 1.36                                              | 75.0                   |
| MIL-125-NH <sub>2</sub> | 2.68       | -0.75        | 1.93         | 12.14       | 20.49                       | 1.67                                              | 66.5                   |

<sup>a</sup>Yield of photocatalytic dehalogenation using halide **1**.

### 3. General procedure.

#### 3.1 Photocatalytic dehalogenation

##### *tert*-Butyl piperidine-1-carboxylate

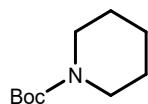

A vial (4 mL) was charged with MOF-525 (1.0 mol%), *tert*-butyl 4-iodopiperidine-1-carboxylate **1** (31.1 mg, 0.1 mmol), PMDETA (63  $\mu$ L, 0.3 mmol), DMF (0.9 mL) and H<sub>2</sub>O (0.1 mL), 2 h, gave compound (18.3 mg, 99%) as an oil. The same use of *tert*-butyl 4-bromo-1-piperidinecarboxylate **9** (26.4 mg, 0.1 mmol) and *tert*-butyl 4-chloropiperidine-1-carboxylate **12** (21.9 mg, 0.1 mmol) to react for 6-12 h, obtain the corresponding compounds (13.7 mg, 74% or 1.8 mg, 10%).

<sup>1</sup>H NMR (500 MHz, CDCl<sub>3</sub>)<sup>1</sup>:  $\delta$  = 3.34 – 3.32 (m, 4H), 1.32 (s, 9H), 1.31 – 1.29 (m, 6H).

##### Cyclohexane

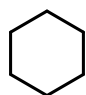

A vial (4 mL) was charged with using MOF-525 (1.0 mol%), 1-iodocyclohexane **2** (21.0 mg, 0.1 mmol), PMDETA (63  $\mu$ L, 0.3 mmol), DMF (0.9 mL) and H<sub>2</sub>O (0.1 mL), 2 h, gave compound (6.7 mg, 80.0%) as an oil. The same use of 1-bromocyclohexane **11** (16.3 mg, 0.1 mmol) to react for 12 h, obtain the corresponding compounds (2.0 mg, 27%).

<sup>1</sup>H NMR (500 MHz, CDCl<sub>3</sub>)<sup>2</sup>:  $\delta$  = 1.41 (m, 12H).

##### Oxane

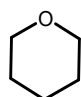

A vial (4 mL) was charged with MOF-525 (1.0 mol%), 4-iodotetrahydropyran **3** (21.2 mg, 0.1 mmol), PMDETA (63  $\mu$ L, 0.3 mmol), DMF (0.9 mL) and H<sub>2</sub>O (0.1 mL), 2 h, gave compound (5.2 mg, 60%) as an oil.

$^1\text{H}$  NMR (500 MHz,  $\text{CDCl}_3$ )<sup>3</sup>:  $\delta$  = 3.63 (t,  $J$  = 5.2 Hz, 4H), 1.63 – 1.58 (m, 2H), 1.57 – 1.53 (m, 4H).

### ***tert*-Butyl azetidine-1-carboxylate**

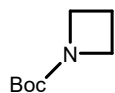

A vial (4 mL) was charged with using MOF-525 (1.0 mol%), *tert*-butyl-3-iodoazetidine-1-carboxylate **4** (28.3 mg, 0.1 mmol), PMDETA (63  $\mu\text{L}$ , 0.3 mmol), DMF (0.9 mL) and  $\text{H}_2\text{O}$  (0.1 mL), 12 h, gave compound (2.7 mg, 18%) as an oil.

$^1\text{H}$  NMR (500 MHz,  $\text{CDCl}_3$ )<sup>4</sup>:  $\delta$  = 3.92 – 3.85 (m, 4H), 2.11 (p,  $J$  = 7.6 Hz, 2H), 1.38 (s, 9H).

### **Methoxybenzene**

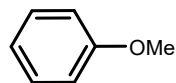

A vial (4 mL) was charged with using MOF-525 (1.0 mol%), *para*-iodoanisole **5** (24.6 mg, 0.1 mmol), PMDETA (63  $\mu\text{L}$ , 0.3 mmol), DMF (0.9 mL) and  $\text{H}_2\text{O}$  (0.1 mL), 12 h, gave compound (4.5 mg, 42%) as an oil.

$^1\text{H}$  NMR (500 MHz,  $\text{CDCl}_3$ )<sup>5</sup>:  $\delta$  = 7.30 – 7.26 (m, 2H), 6.95 – 6.88 (m, 3H), 3.80 (s, 3H).

### **Benzaldehyde**

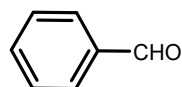

A vial (4 mL) was charged with using MOF-525 (1.0 mol%), 4-iodobenzaldehyde **6** (23.2 mg, 0.1 mmol), PMDETA (63  $\mu\text{L}$ , 0.3 mmol), DMF (0.9 mL) and  $\text{H}_2\text{O}$  (0.1 mL), 12 h, gave compound (4.2 mg, 40%) as an oil.

$^1\text{H}$  NMR (500 MHz,  $\text{CDCl}_3$ )<sup>6</sup>:  $\delta$  = 10.01 (s, 1H), 7.87 (d,  $J$  = 6.9 Hz, 2H), 7.63 (t,  $J$  = 7.4 Hz, 1H), 7.52 (t,  $J$  = 7.6 Hz, 2H).

## Aniline

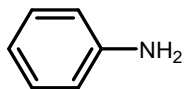

A vial (4 mL) was charged with using MOF-525 (1.0 mol%), 4-iodobenzeneamine **7** (22.0 mg, 0.1 mmol), PMDETA (63  $\mu$ L, 0.3 mmol), DMF (0.9 mL) and H<sub>2</sub>O (0.1 mL), 12 h, gave compound (2.3 mg, 25%) as an oil.

<sup>1</sup>H NMR (500 MHz, CDCl<sub>3</sub>)<sup>7</sup>:  $\delta$  = 7.21 – 7.28 (m, 2H), 6.80 – 6.87 (m, 1H), 6.71 – 6.83 (m, 2H), 3.60 (bs, 2H).

## Benzonitrile

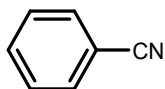

A vial (4 mL) was charged with using MOF-525 (1.0 mol%), 2-Iodobenzonitrile **8** (22.9 mg, 0.1 mmol), PMDETA (63  $\mu$ L, 0.3 mmol), DMF (0.9 mL) and H<sub>2</sub>O (0.1 mL), 12 h, gave compound (1.0 mg, 10%) as an oil.

<sup>1</sup>H NMR (500 MHz, CDCl<sub>3</sub>)<sup>8</sup>:  $\delta$  = 7.61 – 7.50 (m, 3H), 7.41 (t, *J* = 7.3 Hz, 2H).

## Benzylamine

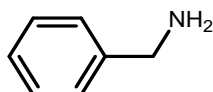

A vial (4 mL) was charged with using MOF-525 (1.0 mol%), 4-Bromobenzylamine **10** (12.6  $\mu$ L, 0.1 mmol), PMDETA (63  $\mu$ L, 0.3 mmol), DMF (0.9 mL) and H<sub>2</sub>O (0.1 mL), 12 h, gave compound (3.2 mg, 30%) as an oil.

<sup>1</sup>H NMR (500 MHz, CDCl<sub>3</sub>)<sup>9</sup>:  $\delta$  = 7.32 - 7.26 (m, 5H), 3.85 (s, 2H), 2.07 (s, active H).

### 3.2 Photocatalytic hydroalkylation

#### ***tert*-Butyl 3-(3-Methoxy-3-oxopropyl)azetidine-1-carboxylate (13)**

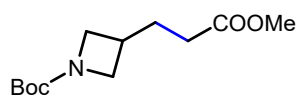

A vial (4 mL) was charged with MOF-525 (5.0 mol%), *tert*-butyl-3-iodoazetidine-1-carboxylate (28.3 mg, 0.1 mmol), methyl acrylate (36  $\mu$ L, 0.4 mmol), PMDETA (104  $\mu$ L, 0.5 mmol), DMF (0.5 mL) and H<sub>2</sub>O (0.5 mL), 48 h, gave compound (15.6 mg, 32%) as an oil.

<sup>1</sup>H NMR (500 MHz, CDCl<sub>3</sub>)<sup>10</sup>:  $\delta$  = 3.98 – 3.90 (t, *J* = 8.4 Hz, 2H), 3.63 (s, 3H), 3.48 (dd, *J* = 8.6, 5.5 Hz, 2H), 2.41 – 2.51 (m, 1H), 2.23 (t, *J* = 7.5 Hz, 2H), 1.85 (q, *J* = 7.6 Hz, 2H), 1.39 (s, 9H).

#### ***tert*-Butyl 3-(3-Amino-3-oxopropyl)azetidine-1-carboxylate (14)**

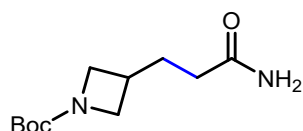

A vial (4 mL) was charged with using MOF-525 (5.0 mol%), *tert*-butyl-3-iodoazetidine-1-carboxylate (28.3 mg, 0.1 mmol), acrylamide (29 mg, 0.4 mmol), PMDETA (104  $\mu$ L, 0.5 mmol), DMF (0.5 mL) and H<sub>2</sub>O (0.5 mL), 48 h, gave compound (19.9 mg, 43%) as an oil.

<sup>1</sup>H NMR (500 MHz, CDCl<sub>3</sub>)<sup>10</sup>:  $\delta$  = 5.80 – 5.59 (m, 2H), 3.92 (t, *J* = 8.3 Hz, 2H), 3.47 (dd, *J* = 8.5, 5.4 Hz, 2H), 2.53 – 2.40 (m, 1H), 2.10 (t, *J* = 7.5 Hz, 2H), 1.85 (q, *J* = 7.6 Hz, 2H), 1.38 (s, 9H).

#### ***tert*-Butyl 3-(2-(Diethoxyphosphoryl)ethyl)azetidine-1-carboxylate (15)**

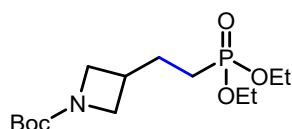

A vial (4 mL) was charged with using MOF-525 (5.0 mol%), *tert*-butyl-3-iodoazetidine-1-carboxylate (28.3 mg, 0.1 mmol), diethyl vinylphosphonate (62  $\mu$ L, 0.4 mmol), PMDETA (104  $\mu$ L, 0.5 mmol), DMF (0.5 mL) and H<sub>2</sub>O (0.5 mL), 48 h, gave compound (35.6 mg, 55%) as an oil.

$^1\text{H}$  NMR (500 MHz,  $\text{CDCl}_3$ )<sup>10</sup>:  $\delta$  = 4.10 – 3.95 (m, 4H), 3.90 (t,  $J$  = 8.3 Hz, 2H), 3.45 (dd,  $J$  = 8.6, 5.4 Hz, 2H), 2.50 – 2.41 (m, 1H), 1.85 – 1.70 (m, 2H), 1.63 – 1.50 (m, 2H), 1.32 (s, 9H), 1.22 (t,  $J$  = 7.1 Hz, 6H).

### ***tert*-Butyl 3-(3-Methoxy-2-methyl-3-oxopropyl)azetidine-1-carboxylate (16)**

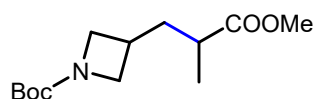

A vial (4 mL) was charged with MOF-525 (5.0 mol%), *tert*-butyl-3-iodoazetidine-1-carboxylate (28.3 mg, 0.1 mmol), methyl methacrylate (43  $\mu\text{L}$ , 0.4 mmol), PMDETA (104  $\mu\text{L}$ , 0.5 mmol), DMF (0.5 mL) and  $\text{H}_2\text{O}$  (0.5 mL), 48 h, gave compound (22.2 mg, 43%) as an oil.

$^1\text{H}$  NMR (500 MHz,  $\text{CDCl}_3$ )<sup>10</sup>:  $\delta$  = 3.96 (t,  $J$  = 8.3 Hz, 1H), 3.91 (t,  $J$  = 8.3 Hz, 1H), 3.60 (s, 3H), 3.46 (t,  $J$  = 6.0 Hz, 1H), 3.44 (t,  $J$  = 6.0 Hz, 1H), 2.52 – 2.40 (m, 1H), 2.39 – 2.29 (m, 1H), 1.91 (dt,  $J$  = 13.8, 7.7 Hz, 1H), 1.63 (ddd,  $J$  = 14.0, 8.2, 6.1 Hz, 1H), 1.37 (s, 9H), 1.08 (d,  $J$  = 7.0 Hz, 3H).

### **3-(1-(*tert*-Butoxycarbonyl)azetidin-3-yl)propanoic acid (17)**

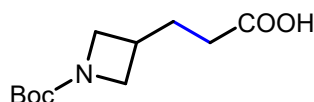

A vial (4 mL) was charged with MOF-525 (5.0 mol%), *tert*-butyl-3-iodoazetidine-1-carboxylate (28.3 mg, 0.1 mmol), acrylic acid (28  $\mu\text{L}$ , 0.4 mmol), PMDETA (104  $\mu\text{L}$ , 0.5 mmol), DMF (0.5 mL) and  $\text{H}_2\text{O}$  (0.5 mL), 48 h, gave compound (6.9 mg, 23%) as an oil.

$^1\text{H}$  NMR (500 MHz,  $\text{CDCl}_3$ )<sup>10</sup>:  $\delta$  = 3.93 (t,  $J$  = 8.4 Hz, 2H), 3.46 (dd,  $J$  = 8.6, 5.5 Hz, 2H), 2.55 – 2.42 (m, 1H), 2.23 (t,  $J$  = 7.4 Hz, 2H), 1.86 (q,  $J$  = 7.6 Hz, 2H), 1.35 (s, 9H).

### ***tert*-Butyl 3-(2-Cyanoethyl)azetidine-1-carboxylate (18)**

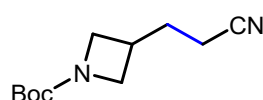

A vial (4 mL) was charged with MOF-525 (5.0 mol%), *tert*-butyl-3-iodoazetidine-1-carboxylate (28.3 mg, 0.1 mmol), acrylonitrile (26  $\mu\text{L}$ , 0.4



mmol), PMDETA (104  $\mu$ L, 0.5 mmol), DMF (0.5 mL) and H<sub>2</sub>O (0.5 mL), 48 h, gave compound (38.9 mg, 76%) as an oil.

<sup>1</sup>H NMR (500 MHz, CDCl<sub>3</sub>)<sup>10</sup>:  $\delta$  = 4.01 (t,  $J$  = 8.4 Hz, 2H), 3.55 – 3.52 (dd,  $J$  = 8.7, 5.4 Hz, 2H), 2.62 – 2.56 (m, 1H), 2.29 (t,  $J$  = 7.1 Hz, 2H), 1.92 (q,  $J$  = 7.3 Hz, 2H), 1.37 (s, 9H);

### ***tert*-Butyl 3-(4-Methoxy-4-oxobutan-2-yl)azetidine-1-carboxylate (19)**

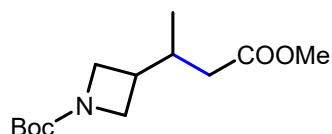

A vial (4 mL) was charged with MOF-525 (5.0 mol%), *tert*-butyl-3-iodoazetidine-1-carboxylate (28.3 mg, 0.1 mmol), methyl crotonate (43  $\mu$ L, 0.4 mmol), PMDETA (104  $\mu$ L, 0.5 mmol), DMF (0.5 mL) and H<sub>2</sub>O (0.5 mL), 48 h, gave compound (40.3 mg, 78%) as an oil.

<sup>1</sup>H NMR (500 MHz, CDCl<sub>3</sub>)<sup>10</sup>:  $\delta$  = 3.86 (t,  $J$  = 8.4 Hz, 1H), 3.85 (t,  $J$  = 8.2 Hz, 1H), 3.62 (s, 3H), 3.57 – 3.53 (m, 2H), 2.36 – 2.25 (m, 1H), 2.25 – 2.18 (m, 1H), 2.14 – 2.04 (m, 1H), 2.04 – 1.98 (m, 1H), 1.37 (s, 9H), 0.85 (d,  $J$  = 6.3 Hz, 3H).

### ***tert*-Butyl 3-(2-(Pyridin-2-yl)ethyl)azetidine-1-carboxylate (20)**

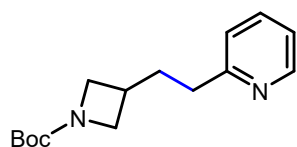

A vial (4 mL) was charged with MOF-525 (5.0 mol%), *tert*-butyl-3-iodoazetidine-1-carboxylate (28.3 mg, 0.1 mmol), 2-vinylpyridine (43  $\mu$ L, 0.4 mmol), PMDETA (104  $\mu$ L, 0.5 mmol), DMF (0.5 mL) and H<sub>2</sub>O (0.5 mL), 48 h, gave compound (18.6 mg, 35%) as an oil.

<sup>1</sup>H NMR (500 MHz, CDCl<sub>3</sub>)<sup>10</sup>:  $\delta$  = 8.45 – 8.41 (m, 1H), 7.51 (td,  $J$  = 7.7, 1.8 Hz, 1H), 7.02 (m, 2H), 3.90 (t,  $J$  = 8.3 Hz, 2H), 3.46 (dd,  $J$  = 8.5, 5.6 Hz, 2H), 2.71 – 2.63 (m, 2H), 2.51 – 2.40 (m, 1H), 1.94 (q,  $J$  = 7.7 Hz, 2H), 1.36 (s, 9H).

### 3.3 Photocatalytic polyfluoroarylation

#### 1-bromo-4-cyclohexyl-2,3,5,6-tetrafluorobenzene (21)

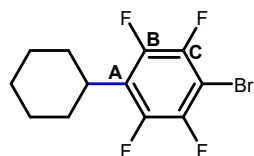

A vial (4 mL) was charged with MOF-525 (2.5 mol%), 1-iodocyclohexane (42.0 mg, 0.2 mmol), bromopentafluorobenzene (246.9 mg, 1.0 mmol), PMDETA (208  $\mu$ L, 1.0 mmol), DMF (0.4 mL), 24 h, gave compound (42.4mg, 69%) as an oil.

A:B:C=30:26:7

$^1\text{H}$  NMR (500 MHz,  $\text{CDCl}_3$ )<sup>11</sup>:  $\delta$  = 2.41 – 2.24 (m, 1H), 1.66 – 1.36 (m, 6H), 1.24 – 0.93 (m, 4H).

#### 1-chloro-4-cyclohexyl-2,3,5,6-tetrafluorobenzene (22)

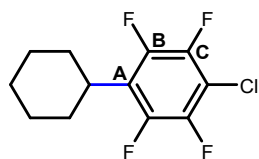

A vial (4 mL) was charged with using MOF-525 (2.5 mol%), 1-iodocyclohexane (42.0 mg, 0.2 mmol), chloropentafluorobenzene (202.5 mg, 1.0 mmol), PMDETA (208  $\mu$ L, 1.0 mmol), DMF (0.4 mL), 24 h, gave compound (31.2 mg, 59%) as an oil.

A:B:C=30:24:5

$^1\text{H}$  NMR (500 MHz,  $\text{CDCl}_3$ )<sup>11</sup>:  $\delta$  = 3.04 – 2.70 (m, 1H), 1.56 – 1.23 (m, 7H), 0.98 (td,  $J$  = 13.5, 12.5, 7.3 Hz, 3H).

#### 1-cyclohexyl-2,3,5,6-tetrafluoro-4-(trifluoromethyl)benzene (23)

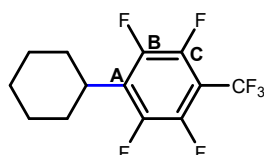

A vial (4 mL) was charged with MOF-525 (2.5 mol%), 1-iodocyclohexane (42.0 mg, 0.2 mmol), octafluoroyoluene (230.1 mg, 1.0 mmol), PMDETA (208  $\mu$ L, 1.0 mmol), DMF (0.4 mL), 24 h, gave compound (36.6 mg, 61%) as an oil.

A:B:C=29:23:9

$^1\text{H}$  NMR (500 MHz,  $\text{CDCl}_3$ )<sup>11</sup>:  $\delta$  = 2.74 (dt,  $J$  = 28.1, 11.9, 4.3 Hz, 1H), 1.63 – 1.26 (m, 7H), 0.91 (ddt,  $J$  = 21.8, 13.0, 4.7 Hz, 3H).

#### 1-cyclohexyl-2,3,4,5,6-pentafluorobenzene (24)

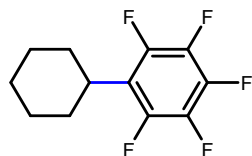

A vial (4 mL) was charged with MOF-525 (2.5 mol%), 1-iodocyclohexane (42.0 mg, 0.2 mmol), hexafluorobenzene (186.0 mg, 1.0 mmol), PMDETA (208  $\mu\text{L}$ , 1.0 mmol), DMF (0.4 mL), 24 h, gave compound (21.5 mg, 43%) as an oil.

$^1\text{H}$  NMR (500 MHz,  $\text{CDCl}_3$ )<sup>11</sup>:  $\delta$  = 2.38 (tt,  $J$  = 11.3, 4.7 Hz, 1H), 1.34 – 1.00 (m, 7H), 0.83 – 0.54 (m, 3H).

#### 4-(perfluorophenyl)tetrahydro-2H-pyran (25)

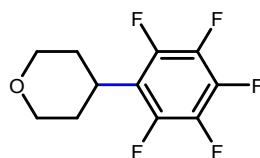

A vial (4 mL) was charged with MOF-525 (2.5 mol%), 4-iodotetrahydropyran (42.4 mg, 0.2 mmol), hexafluorobenzene (186.0 mg, 1.0 mmol), PMDETA (208  $\mu\text{L}$ , 1.0 mmol), DMF (0.4 mL), 24 h, gave compound (27.2 mg, 54%) as an oil.

$^1\text{H}$  NMR (500 MHz,  $\text{CDCl}_3$ )<sup>11</sup>:  $\delta$  = 3.43 (dd,  $J$  = 11.7, 4.5 Hz, 2H), 2.88 (td,  $J$  = 12.0, 2.0 Hz, 2H), 2.59 (tt,  $J$  = 12.5, 3.8 Hz, 1H), 1.67 (tddd,  $J$  = 12.3, 10.7, 4.6, 1.6 Hz, 2H), 1.03 – 0.95 (m, 2H).

#### 1,2,3,4,5-pentafluoro-6-(4-phenylbutyl)benzene (26)

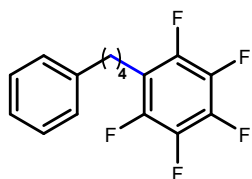

A vial (4 mL) was charged with MOF-525 (2.5 mol%), (4-iodobutyl)benzene (52.0 mg, 0.2 mmol), hexafluorobenzene (186.0 mg, 1.0 mmol), PMDETA

(208  $\mu\text{L}$ , 1.0 mmol), DMF (0.4 mL), 24 h, gave compound (18 mg, 30%) as an oil.

$^1\text{H}$  NMR (500 MHz,  $\text{CDCl}_3$ )<sup>11</sup>:  $\delta$  = 6.66 – 6.53 (m, 2H), 6.52 – 6.43 (m, 3H), 5.84 – 5.66 (m, 2H), 5.42 (d,  $J$  = 9.7 Hz, 1H), 3.65 – 3.43 (m, 2H), 2.05 (t,  $J$  = 6.9 Hz, 2H), 1.16 (dq,  $J$  = 6.9, 2.3, 1.5 Hz, 4H).

### ***tert*-butyl 3-(perfluorophenyl)azetidine-1-carboxylate (27)**

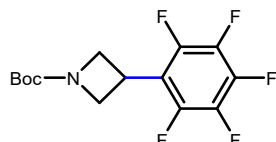

A vial (4 mL) was charged with MOF-525 (2.5 mol%), *tert*-butyl-3-iodoazetidine-1-carboxylate (56.6 mg, 0.2 mmol), hexafluorobenzene (186.0 mg, 1.0 mmol), PMDETA (208  $\mu\text{L}$ , 1.0 mmol), DMF (0.4 mL), 24 h, gave compound (28.8 mg, 45%) as an oil.

$^1\text{H}$  NMR (500 MHz,  $\text{CDCl}_3$ )<sup>11</sup>:  $\delta$  = 3.61 (t,  $J$  = 8.7 Hz, 2H), 3.43 (dd,  $J$  = 8.5, 7.0 Hz, 2H), 3.38 (tt,  $J$  = 8.9, 6.5 Hz, 1H), 0.77 (s, 9H).

### ***tert*-butyl 4-(perfluorophenyl)piperidine-1-carboxylate (28)**

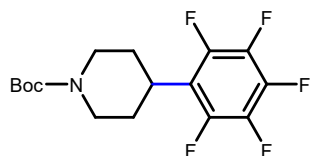

A vial (4 mL) was charged with MOF-525 (2.5 mol%), *tert*-butyl 4-iodopiperidine-1-carboxylate (62.2 mg, 0.2 mmol), hexafluorobenzene (186.0 mg, 1.0 mmol), PMDETA (208  $\mu\text{L}$ , 1.0 mmol), DMF (0.4 mL), 24 h, gave compound (24.5 mg, 35%) as an oil.

$^1\text{H}$  NMR (500 MHz,  $\text{CDCl}_3$ )<sup>11</sup>:  $\delta$  = 3.55 (s, 2H), 2.40 (tt,  $J$  = 12.5, 3.7 Hz, 1H), 2.13 – 2.04 (m, 2H), 1.71 – 1.12 (m, 2H), 1.10 – 0.85 (m, 3H), 0.87 (s, 9H).

#### 4. GC-MS spectrum for the trapping of $\alpha$ -aminoalkyl radical

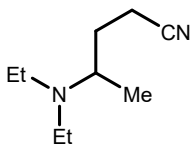

Chemical Formula:  $C_9H_{18}N_2$   
Exact Mass: 154.15  
Molecular Weight: 154.26  
 $m/z$ : 154.15 (100.0%), 155.15 (9.7%)  
Elemental Analysis: C, 70.08; H, 11.76; N, 18.16

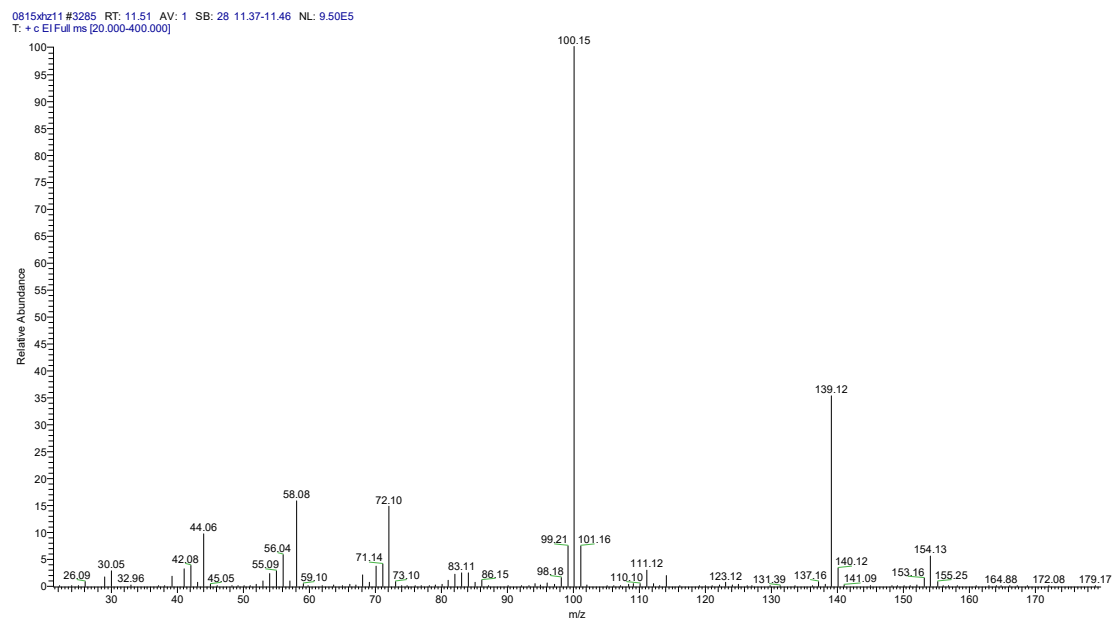

## 5. Determination of the Quantum Yield

### Determination of the photon flux at 435 nm:

The photon flux of the spectrophotometer was determined following the work of Yoon and coworkers,<sup>12</sup> utilizing standard ferrioxalate actinometry.<sup>13,14</sup> A 0.15 M solution of potassium ferrioxalate was prepared by dissolving 2.21 g of potassium ferrioxalate hydrate in 30 mL of 0.05 M H<sub>2</sub>SO<sub>4</sub>. A buffered solution of phenanthroline was prepared by dissolving 50 mg of phenanthroline and 11.25 g of sodium acetate in 50 mL of 0.5 M H<sub>2</sub>SO<sub>4</sub>. Both solutions were stored in the dark. To determine the photon flux of the spectrophotometer, 2.0 mL of the potassium ferrioxalate solution was placed in the vial and irradiated for 90.0 s at 435 nm. After irradiation, 0.35 mL of the phenanthroline solution was added to the vial. The solution was allowed to rest for 1 h (complete coordination of ferrous ions to phenanthroline). The absorbances of irradiated and non-irradiated solutions at 510 nm were measured respectively. Conversion was calculated using eq 1:

$$\text{Mol Fe}^{2+} = \frac{V \times \Delta A}{l \times \epsilon} \quad (1)$$

In this equation,  $V$  is the total volume of the solution after addition of the phenanthroline (0.00235 L),  $\Delta A$  is the difference in the absorbance at 510 nm between the irradiated and the non-irradiated solutions,  $l$  is the path length (1.0 cm), and  $\epsilon$  is the molar absorptivity at 510 nm (11100 L mol<sup>-1</sup> cm<sup>-1</sup>).<sup>12-14</sup> The mole of Fe<sup>2+</sup> was calculated to be 3.667×10<sup>-4</sup>.

The photon flux can be calculated using eq 2:

$$\text{photon flux} = \frac{\text{Mol Fe}^{2+}}{\Phi \times t \times f} \quad (2)$$

In this equation,  $\Phi$  is the quantum yield of the ferrioxalate actinometer ( $\Phi = 1.01$  for a 0.15 M solution),<sup>13-15</sup>  $t$  is the time of the irradiation (90.0 s), and  $f$  is the fraction of the light absorbed at 435 nm, which can be calculated using eq 3 based on the measured absorbance ( $A$ ) (see Figure S16).

$$f = 1 - 10^{-A} \quad (3)$$

Thus, the  $f$  value was determined to be 0.999 and the photon flux of the spectrophotometer was calculated (average of three experiments) to be 4.038×10<sup>-6</sup> einstein s<sup>-1</sup>.

### Determination of the quantum yield:

For dehalogenation reaction, a 4 mL vial was charged with MOF-525 (1.0 mol%), **1** (0.1 mmol), PMDETA (0.3 mmol), DMF/H<sub>2</sub>O ( $v/v=9/1$ , 1.0 mL). The sample was stirred and irradiated at 435 nm for 600 s (10 min).

For hydroalkylation reaction, MOF-525 (5.0 mol%), **4** (0.1 mmol), acrylonitrile (0.4 mmol), PMDETA (0.5 mmol), DMF/H<sub>2</sub>O ( $v/v=1/1$ , 1.0 mL). The sample was stirred and irradiated at 435 nm for 3600 s (1 h).

For polyfluoroarylation reaction, MOF-525 (2.5 mol%), 1-iodocyclohexane (0.2 mmol), bromopentafluorobenzene (1.0 mmol), PMDETA (1.0 mmol), DMF (0.4 mL). The sample was stirred and irradiated at 435 nm for 3600 s (1 h).

The yield of the product was determined by gas chromatography, and the quantum yield was determined using the following eq 4. The experimental results were shown in Table S3.

$$\Phi = \frac{\text{mol product}}{\text{flux} \times t \times f} \quad (4)$$

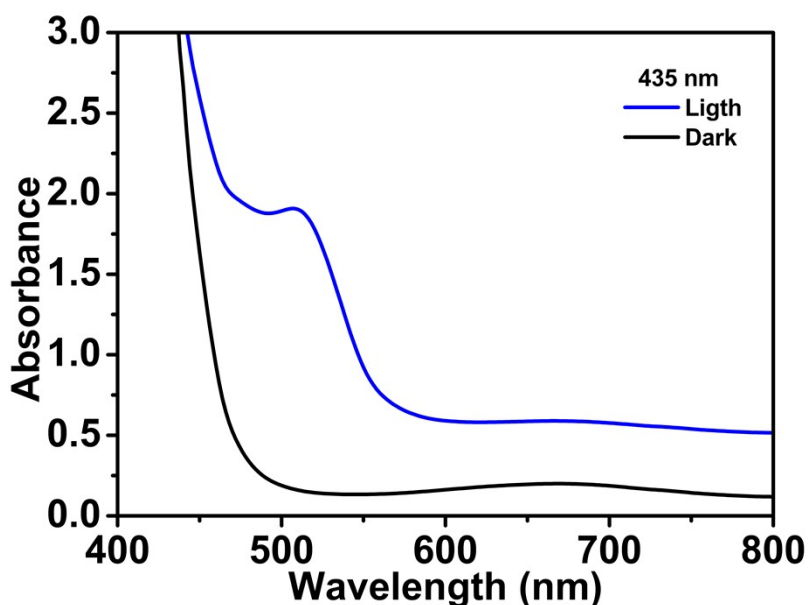

**Figure S16.** Absorbance of the ferrioxalate actinometer solution.

**Table S3.** Quantum yields of photocatalytic reactions at 435 nm.

| Entry | Reaction            | Time (s) | Yield (%) | Quantum yield |
|-------|---------------------|----------|-----------|---------------|
| 1     | Dehalogenation      | 600      | 1.6       | 0.66          |
| 2     | Hydroalkylation     | 3600     | 0.3       | 0.02          |
| 3     | Polyfluoroarylation | 3600     | 0.7       | 0.05          |

## 6. $^1\text{H}$ NMR Spectral Data

### *tert*-Butyl piperidine-1-carboxylate

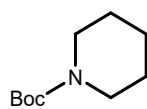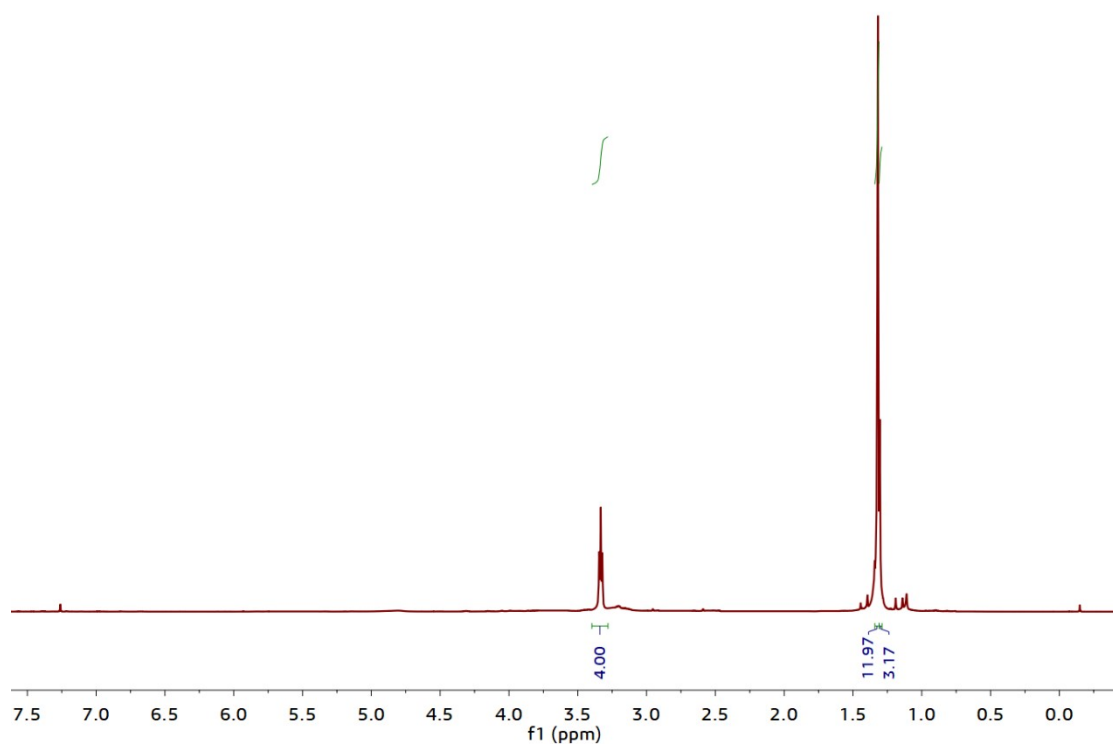



***tert*-Butyl 3-(2-Cyanoethyl)azetidine-1-carboxylate (18)**

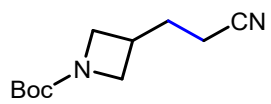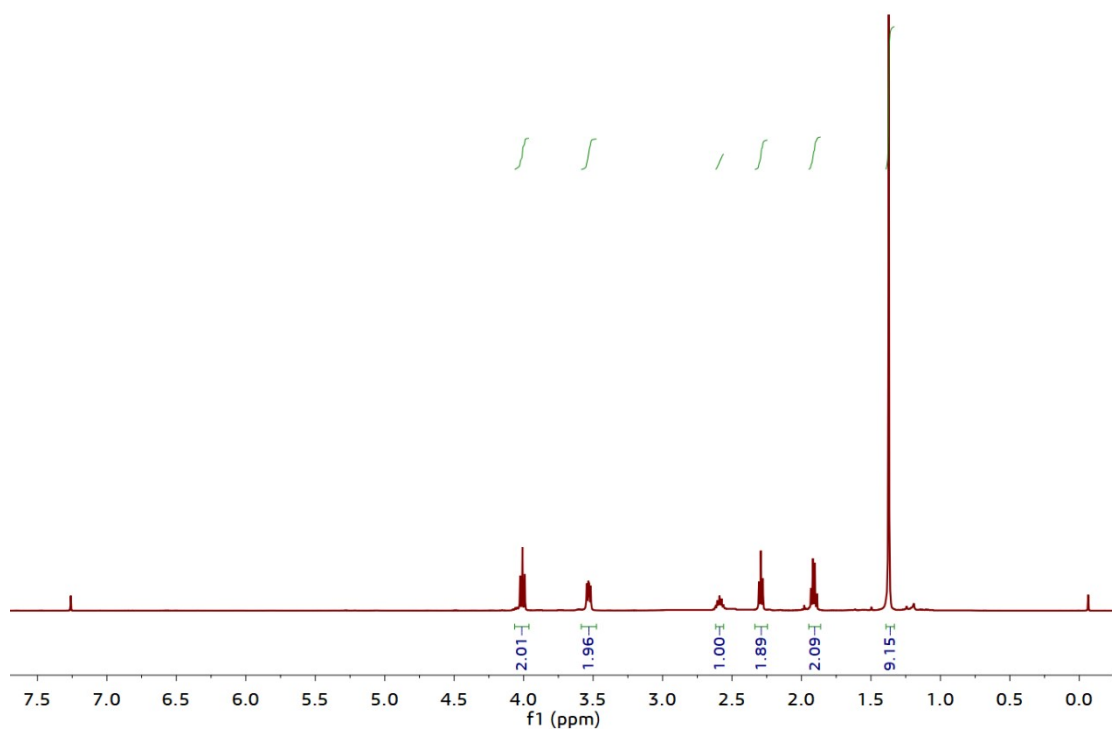

# 1-bromo-4-cyclohexyl-2,3,5,6-tetrafluorobenzene (21)

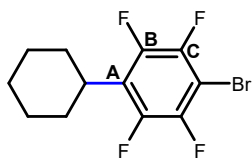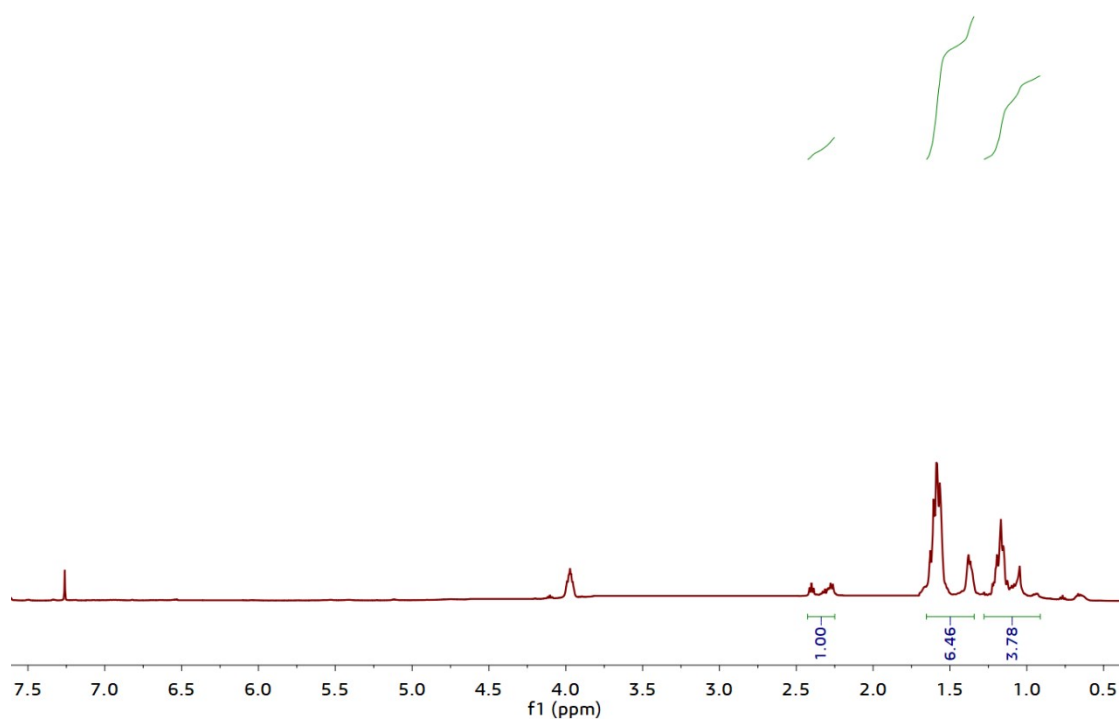

## 7. References

1. N. J. Taylor, E. Emer, S. Preshlock, M. Schedler, M. Tredwell, S. Verhoog, J. Mercier, G. Christophe and G. Véronique, *J. Am. Chem. Soc.*, 2017, **139**, 8267–8276.
2. D.-W. Wang, S.-M. Lu and Y.-G. Zhou, *Tetrahedron Letters*, 2009, **50**, 1282–1285.
3. T. Liang, G. Dong, C. Li, X. Xu and Z. Xu, *Org. Lett.*, 2022, **24**, 1817–1821.
4. L. K. G. Ackerman, J. I. M. Alvarado and A. G. Doyle, *J. Am. Chem. Soc.*, 2018, **140**, 14059–14063.
5. Z. Yan, X.-A. Yuan, Y. Zhao, C. Zhu and J. Xie, *Angew. Chem. Int. Ed.*, 2018, **57**, 12906–12910.
6. J. Xu, Y. Zhang, X. Yue, J. Huo, D. Xiong and P. Zhang, *Green Chem.*, 2021, **23**, 5549–5555.
7. U. Sharma, P. Kumar, N. Kumar, V. Kumar and B. Singh, *Adv. Synth. Catal.*, 2010, **352**, 1834–1840.
8. S. R. Mudshinge, C. S. Potnis, B. Xu and G. B. Hammond, *Green Chem.*, 2020, **22**, 4161–4164.
9. L. Liu, J. Li, Y. Ai, Y. Liu, J. Xiong, H. Wang, Y. Qiao, W. Liu, S. Tan, S. Feng, K. Wang, H. Sun and Q. Liang, *Green Chem.*, 2019, **21**, 1390–1395.
10. T. Constantin, M. Zanini, A. Regni, N. S. Sheikh, F. Juliá and D. Leonori, *Science*, 2020, **367**, 1021–1026.
11. B. Niu, K. Sachidanandan, B. G. Blackburn, M. V. Cooke and S. Laulhé, *Org. Lett.*, 2022, **24**, 916–920.
12. M. A. Cismesia and T. P. Yoon, *Chem. Sci.*, 2015, **6**, 5426–5434.
13. E. Fernandez and J. M. Figuera, *J. Photochem.*, 1979, **11**, 69–71.
14. W. D. Bowman and J. N. Demas, *J. Phys. Chem.*, 1976, **20**, 2434–2435.
15. C. G. Hatchard and C. A. Parker, *Proc. R. Soc. Lond. A*, 1956, **235**, 518–536.
